# Supplementary material for: Defective autophagy is a key feature of cerebral cavernous malformations
Source: PubMed Central journal article supplement (PMC4644374; doi:10.15252/emmm.201505316), 2015-09-28

**A**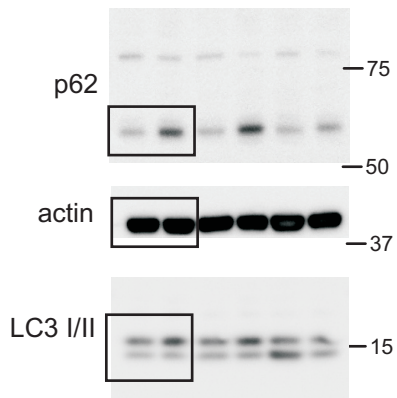**C**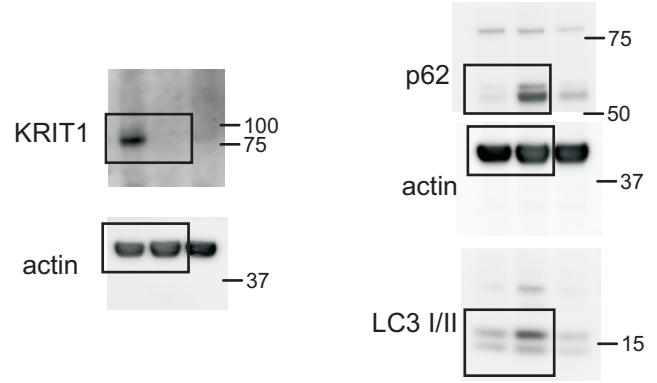**E**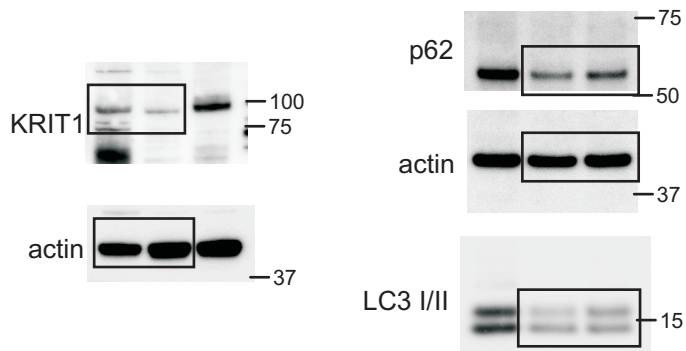**F**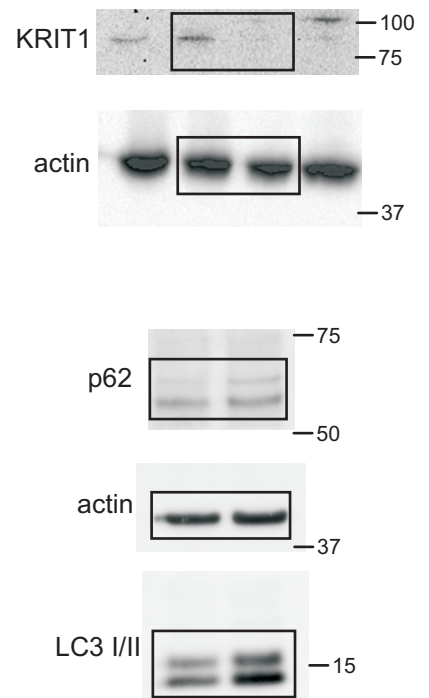

Supplement: emmm0007-1403-sd3.pdf [file emmm0007-1403-sd3.pdf]
